# Supplementary material
Source: ML conference proceedings conference paper supplement (https://openreview.net/forum?id=5zDU4pFxkg)
Supplement: supplementary_material [file attachment]

## 810 A DETAILS OF BENCHMARKS

### 811 A.1 ADDITIONAL TASK IMPLEMENTATION PROCESS AND STATISTICS

812 In Section 3.5, we described our general benchmark creation process. Our task creation process can be  
 813 divided into three stages: (a) preparing the input image; (b) formulating task prompts; (c) developing  
 814 scripts for auto evaluation. Additionally, some specific tasks require extra steps to implement, such as  
 815 question and answer generation. In what follows, we describe these steps in detail.

816 **Maze Navigation, Main Task** In this task, agents need to find a safe path to navigate from the start  
 817 grid to the goal. We adjust the map generation mechanisms to ensure the positions of the start grid,  
 818 the goal, and the holes are all randomly generated, while ensuring there is at least one viable safe  
 819 path from the start grid to the goal. For each grid, the probability that it contains the hole is 20%.

820 **Maze Navigation, T1** In this task, agents need to identify whether a specific grid is safe (i.e., whether  
 821 it contains a hole or not). We randomly sample a row number and a column number and ask the  
 822 safety question for this randomly chosen grid in each problem of this task. Additionally, to prevent  
 823 the model from patterned guessing and achieving falsely high ratings (e.g., answering "not safe" for  
 824 all images and obtaining high accuracy scores), we regenerate the map for this task to ensure that the  
 825 safe and unsafe grids each comprise around 50% of the total grids in a single map.

826 **Maze Navigation, T3** In this task, agents need to find the correct textual description that fits the visual  
 827 input. For each problem, we prepare four textual description candidates. One candidate is the correct  
 828 answer, one has the correct size but an incorrect map arrangement, and the other two candidates have  
 829 the wrong size. The candidates are shuffled to prevent the model from making random guesses.

830 **Maze Navigation, T4** In this task, agents need to determine if the given action series is safe or not.  
 831 Similarly, to prevent the models from achieving falsely high ratings through guessing, we generate  
 832 the action series to ensure that around 50% of them are safe and the other 50% are not. For the unsafe  
 833 paths, the particular step in which the player steps into a hole is also randomly chosen.

834 **Blocks World, T2** In this task, agents need to determine the spatial relation between two designated  
 835 blocks. In addition to the directional relation ("above" and "below"), we note that it is important for  
 836 agents to recognize if two blocks are at the same stack or not. Therefore, we design the following  
 837 four candidates for this question: (A) The first block is directly above the second block, and they are  
 838 in the same stack; (B) The first block is directly below the second block, and they are in the same  
 839 stack; (C) The two blocks are at different stacks; (D) At least one of the mentioned blocks do not  
 840 exist in the presented image.

841 **Blocks World, T4** In this task, agents need to determine the consequence of a given moving plan.  
 842 Specifically, some invalid moving plans contain actions that cannot be executed in the given scenario,  
 843 such as trying to move a block that is covered by another block. To prevent guessing in this task,  
 844 similar to the maze navigation scenario, we generate the action plans to ensure that half of the plan  
 845 candidates are executable. For the plans that cannot be executed, there can be two types of errors:  
 846 first, the plan may include steps that involve moving a block from or to an invalid position; second,  
 847 the plan may try to move a block that does not exist. We randomly generate these errors in inputs.

848 **Google Map** For each task in this scenario, the input image is derived from real Google map  
 849 intersections. To ensure that the roads on the map align with these four directions (north, south, east,  
 850 west), we selected a map of New York City, where the streets and avenues intersect at 90 degrees. The  
 851 map has been rotated to ensure that streets and avenues are strictly aligned in one of these cardinal  
 852 directions. The starting location and the goal are randomly chosen crossroads in the map.

853 **Statistics** The VSP benchmark consists of 12 tasks in four scenarios. In *Maze Navigation* and *Blocks*  
 854 *World* scenarios, the problems are designed with different difficulty levels. Each difficulty level  
 855 consists of 100 problems. In total, the VSP benchmark includes 4.6k questions.

### 856 A.2 COMPLETE PROMPT

857 In this subsection, we provide the complete prompts for each task. Generally, the prompts consist of  
 858 a general task description at the beginning and a specific question at the end. The prompts interleave  
 859 text and images in a pattern similar to a human-readable manual with reference figures.

864  
865  
866  
867  
868  
869  
870  
871  
872  
873  
874  
875  
876  
877  
878  
879  
880  
881  
882  
883  
884  
885  
886  
887  
888  
889  
890  
891  
892  
893  
894  
895  
896  
897  
898  
899  
900  
901  
902  
903  
904  
905  
906  
907  
908  
909  
910  
911  
912  
913  
914  
915  
916  
917

### Prompt for Maze Navigation scenario, Main task (Spatial Planning):

As a professional maze solver, your task is to analyze a grid-based map and devise an action plan that enables a player to reach the goal from the starting point without falling into any holes, using the fewest possible moves. Since coding is not within your skill set, your approach relies on logical reasoning of the map.

#### ## Game Setup

- The game presents a fully observable grid-based map.
- The player starts at a specified grid square, with the goal located elsewhere on the map.
- Each grid square is either safe or contains a hole.
- Your goal is to guide the player to the goal while avoiding holes.

The following figure shows how the player, the holes (non-safe grid), the lands (safe grids), and the goals look like.

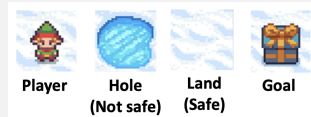

#### ## Moving Rules

- The action plan involves a series of moves: 'L' (left), 'R' (right), 'U' (up), or 'D' (down).
- Each move transfers the player to the adjacent square in that direction, provided it is a safe square. The player cannot move more than one square at a time.
- Moving off the edge of the map has no effect. The player will remain at the same square.
- DO NOT MOVE INTO A HOLE! Falling into a hole results in defeat.
- Locating at the grid containing the goal results in victory.

We provide an example to further illustrate the rules.

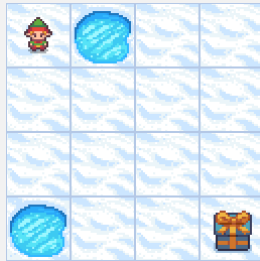

In this provided example:

- The player is at Row 1, Column 1;
- The goal is at Row 4, Column 4;
- There are two holes: one at Row 1, Column 2, and another at Row 4, Column 1.
- The player can move DOWN. This is because moving down brings them to Row 2, Column 1, and this cell is safe (without holes).
- Moving UP has no effects. This is because the player is already in the topmost row.
- Similarly, moving LEFT has no effects because the player is already in the left-most column.
- Moving RIGHT places the player at Row 1, Column 2. Since there is a hole at this grid, this move results in a loss.

#### ## Procedure and Output

Now you will solve the given maze. To solve it, please generate text exactly follow the following steps:

1. First, interpret map. List where the player is at now, where is the goal, and where are the holes.
2. Then, generate an action plan to navigate to the goal step by step. At each step, you should check:
  - (a) Where the current move leads the player to (the row and column);
  - (b) What is in that grid. Is it a hole? Is it the goal? Is it an empty space?
  - (c) Determine if that is a safe action. If not, correct it and re-generate the action plan.
3. Next, verify if the steps successfully navigate the player to the goal without falling into the hole. If not, restart from step 2 and re-generate this step.

*(continue in next page)*

918  
919  
920  
921  
922  
923  
924  
925  
926  
927  
928  
929  
930  
931  
932  
933  
934  
935  
936  
937  
938  
939  
940  
941  
942  
943  
944  
945  
946  
947  
948  
949  
950  
951  
952  
953  
954  
955  
956  
957  
958  
959  
960  
961  
962  
963  
964  
965  
966  
967  
968  
969  
970  
971

(Continued)

4. If succeed, output an aggregated plan using "Action plan: <PLAN>", where <PLAN> is a string concatenated action in each step. For example, "Action plan: L,L,R,U,D" meaning an action plan of left, left, right, up, and down. Double check the final action plan is consistent with the previous analysis. Do not output any extra content after the above aggregated output.

Please generate the action plan for the following maze:

**Prompt for Maze Navigation scenario, Task 1 (Single Object Perception):**

In this task, you will analyze a maze to determine if there is a hole in a specific position. The following figure illustrates the appearances of the player, holes, lands, and the goal within the maze. You will need to focus on the appearance of the hole.

Here is an example to illustrate how to analyze and answer the question:

Example question: Is there a hole in row 3, column 3?

In this example:

- We check the position in row 3, column 3.
- According to the image, it is a land square. It does not contain a hole.
- Therefore, you will output "<Output> No".

Your output should be: "<Output> No" or "<Output> Yes", depending on whether there is a hole at the specified position.

Now you will analyze the following maze and answer the question:  
Is there a hole in row 2, column 1?

972  
973  
974  
975  
976  
977  
978  
979  
980  
981  
982  
983  
984  
985  
986  
987  
988  
989  
990  
991  
992  
993  
994  
995  
996  
997  
998  
999  
1000  
1001  
1002  
1003  
1004  
1005  
1006  
1007  
1008  
1009  
1010  
1011  
1012  
1013  
1014  
1015  
1016  
1017  
1018  
1019  
1020  
1021  
1022  
1023  
1024  
1025

**Prompt for Maze Navigation scenario, Task 2 (Spatial Relation Perception):**

In this task, you will analyze a maze to determine the relative positions of the player and the goal.  
The following figure illustrates the appearances of the player, holes, lands, and the goal within the maze. You will need to focus on the player and the goal.

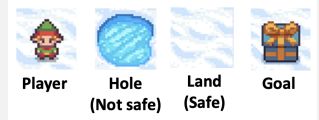

To describe their relative positions, use the directional indicators from “Above”, “Below”, “Left”, “Right”. We provide an example to illustrate how to interpret and describe these positions:

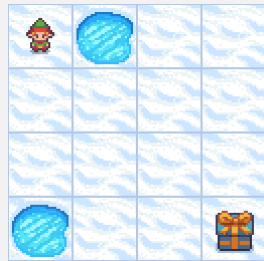

In this example:  
 - We focus on the position of the player and the goal.  
 - Rows: The player is at row 1, and the goal is at row 4. Here, the row number is from top to bottom. Comparing player (row=1) with goal (row=4), player is counted first. Therefore, the player is positioned above the target.  
 - Columns: The player is at column 1, and the goal is at column 4. Here, the column number is from left to right. Comparing player (column=1) with goal (column=4). Therefore, the player is to the left of the target.  
 - Remember that we should answer the player’s position with respect to the goal, not the opposite. Therefore, we answer “Above,Left”.

Your output should be two parts:  
 1. Analyze the rows and columns of the player and the goal like shown above.  
 2. Following your analysis, output answer as “<Output> <Position>”. For example, “<Output> Above,Left” means the player is above and to the left of the goal, and “<Output> Below” means the player is below the goal. Note that you should not output “Left” or “Right” if the player and the goal are at the same column, and similarly, you should not output “Above” or “Below” if the player and the goal are at the same row.

Now you will analyze the following maze and determine the relative position of the player in relation to the goal.

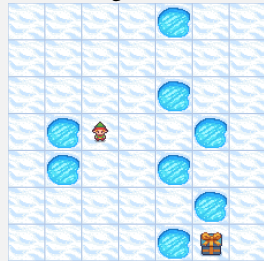

1026  
1027  
1028  
1029  
1030  
1031  
1032  
1033  
1034  
1035  
1036  
1037  
1038  
1039  
1040  
1041  
1042  
1043  
1044  
1045  
1046  
1047  
1048  
1049  
1050  
1051  
1052  
1053  
1054  
1055  
1056  
1057  
1058  
1059  
1060  
1061  
1062  
1063  
1064  
1065  
1066  
1067  
1068  
1069  
1070  
1071  
1072  
1073  
1074  
1075  
1076  
1077  
1078  
1079

**Prompt for Maze Navigation scenario, Task 3 (Environment Perception):**

In this task, you will analyze a maze presented in an image. Later, you will be presented with four choices, each offering a textual representation of a candidate maze. You will need to choose the representation that exactly reflects the contents of the given image.

The following figure illustrates the appearances of the player, holes, lands, and the goal within the maze in the image.

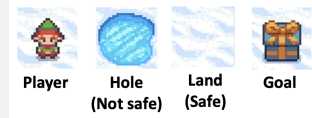

This is how the player, the holes (non-safe grid), the lands (safe grids), and the goals look like in a map:

- The player is represented as "@"
- The hole is represented as "#"
- The safe grid is represented as "\_"
- The goal is represented as "\*"
- If the player is at the goal (at this case the game is solved), that grid is represented as "%"

We provide an example to illustrate how to interpret the input, candidates, and answer the question. Here is the image input:

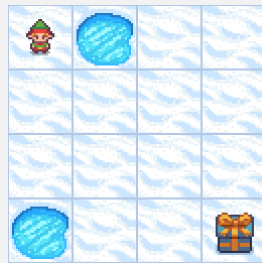

Here are the textual candidates:

(A)

```
| | Col 1 | Col 2 | Col 3 |
| Row 1 | # | _ | _ |
| Row 2 | # | @ | # |
| Row 3 | _ | * | _ |
```

(B)

```
| | Col 1 | Col 2 | Col 3 | Col 4 | Col 5 |
| Row 1 | _ | _ | _ | _ | _ |
| Row 2 | _ | # | _ | _ | _ |
| Row 3 | _ | # | * | _ | # |
| Row 4 | _ | @ | _ | _ | _ |
| Row 5 | _ | _ | _ | # | _ |
```

(C)

```
| | Col 1 | Col 2 | Col 3 | Col 4 |
| Row 1 | @ | # | _ | _ |
| Row 2 | _ | _ | _ | _ |
| Row 3 | _ | _ | _ | _ |
| Row 4 | # | _ | _ | * |
```

(D)

```
| | Col 1 | Col 2 | Col 3 | Col 4 |
| Row 1 | _ | _ | _ | _ |
| Row 2 | * | _ | _ | _ |
| Row 3 | @ | _ | # | _ |
| Row 4 | _ | _ | _ | # |
```

Here is an example of how to analyze and answer the question:

*(continue in next page)*

1080  
1081  
1082  
1083  
1084  
1085  
1086  
1087  
1088  
1089  
1090  
1091  
1092  
1093  
1094  
1095  
1096  
1097  
1098  
1099  
1100  
1101  
1102  
1103  
1104  
1105  
1106  
1107  
1108  
1109  
1110  
1111  
1112  
1113  
1114  
1115  
1116  
1117  
1118  
1119  
1120  
1121  
1122  
1123  
1124  
1125  
1126  
1127  
1128  
1129  
1130  
1131  
1132  
1133

(Continued)

- First, we focus on the difference of the maze shape between the candidates and the input image.
  - We begin by examining the input image. It is a 4-by-4 maze. We then review the candidates. Candidate A is a 3-by-3 maze. Therefore, it is not the correct answer. Similarly, Candidate B is a 5-by-5 maze, which also cannot be correct. Both Candidate C and Candidate D are 4-by-4 mazes. Now we only need to choose from them.
  - For the remaining candidates, we compare the positions of the players, goals, and the holes in the maze.
  - We first check the input image. What is the position of the player in the image? The player is in row 1, column 1. We then check the remaining candidates. For Candidate C, the textual representation indicates the player is also at row 1, column 1, matching the input image. For Candidate D, the player is located at row 3, column 1. Hence, Candidate D is not the correct answer.
  - We double check the remaining Candidate C, and it correctly shows the position of the player, holes, and the goal. It is therefore the correct answer.
- <Answer> C

Your output should consist of two parts:

1. First, analysis the input image and candidates similar to the reasoning process above.
2. Following the reasoning process, output answer as "<Answer> <Choice>", where "<Choice>" is one of A,B,C,D.

Important: Note that there will be only one correct answer. If you find no answer or multiple answers, you must go back and recheck your reasoning process. You are not allowed to provide 0 or more than 1 answer.

Now answer the question below. Here is the image input:

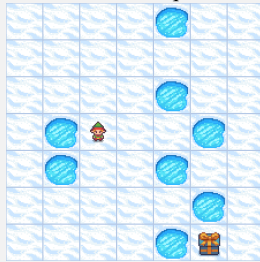

Here are the textual candidates:

<CANDIDATES>

#### Prompt for Maze Navigation scenario, Task 4 (Spatial Reasoning):

You are a maze-solving agent playing a pixelated maze video game. Mazes are presented on grid maps, where each tile can be empty land, or contain a player, hole, or goal. Each of the above tile types are represented as square pixel art images.

In this task, you will analyze a grid-based map and determine if a provided action plan is safe. A safe action plan avoids stepping into holes in the map. The following figure illustrates the appearances of the player, holes, lands, and the goal within the maze.

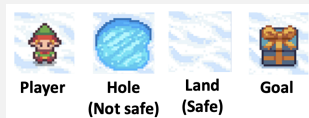

#### ## Moving Rules

- The action plan involves a series of moves: 'L' (left), 'R' (right), 'U' (up), or 'D' (down).
- Each move transfers the player to the adjacent square in that direction, provided it is a safe square. The player cannot move more than one square at a time.
- Moving off the edge of the map has no effect. The player will remain at the same square.
- DO NOT MOVE INTO A HOLE! Falling into a hole results in defeat.
- Locating at the grid containing the goal results in victory.

We provide an example to further illustrate the rules.

(continue in next page)

1134  
1135  
1136  
1137  
1138  
1139  
1140  
1141  
1142  
1143  
1144  
1145  
1146  
1147  
1148  
1149  
1150  
1151  
1152  
1153  
1154  
1155  
1156  
1157  
1158  
1159  
1160  
1161  
1162  
1163  
1164  
1165  
1166  
1167  
1168  
1169  
1170  
1171  
1172  
1173  
1174  
1175  
1176  
1177  
1178  
1179  
1180  
1181  
1182  
1183  
1184  
1185  
1186  
1187

((Continue))

In this provided example:

- The player is at Row 1, Column 1;
- The goal is at Row 4, Column 4;
- There are two holes: one at Row 1, Column 2, and another at Row 4, Column 1.
- The player can move DOWN. This is because moving down brings them to Row 2, Column 1, and this cell is safe (without holes).
- Moving UP has no effects. This is because the player is already in the topmost row.
- Similarly, moving LEFT has no effects because the player is already in the left-most column.
- Moving RIGHT places the player at Row 1, Column 2. Since there is a hole at this grid, this move results in a loss.

## Procedure and Output

Your output should include the following parts:

1. First, interpret map. List where the player is at now, where is the goal, and where are the holes.
2. Then, reasoning by following the given action plan. At each step, you should check:
  - (a) Where the current move leads the player to (the row and column);
  - (b) What is in that grid. Is it a hole? Is it the goal? Is it an empty space?
  - (c) Determine if that is a safe action.
3. Output if the action sequence is safe using "<Output> Yes" or "<Output> No". A safe action sequence should not include any unsafe actions.

Now please determine if the action sequence is safe for this given maze:

The action sequence is:  
Up, Down, Right, Down, Right



1188  
1189  
1190  
1191  
1192  
1193  
1194  
1195  
1196  
1197  
1198  
1199  
1200  
1201  
1202  
1203  
1204  
1205  
1206  
1207  
1208  
1209  
1210  
1211  
1212  
1213  
1214  
1215  
1216  
1217  
1218  
1219  
1220  
1221  
1222  
1223  
1224  
1225  
1226  
1227  
1228  
1229  
1230  
1231  
1232  
1233  
1234  
1235  
1236  
1237  
1238  
1239  
1240  
1241

### Prompt for Block World scenario, Main Task (Spatial Planning):

You are a robot that sorts and organizes colored blocks by adding and removing them to stacks.  
You can move them between stacks to produce a desired end state.

In this task, you will see two photos of blocks. These photos show the beginning and end state of the blocks. Your task is to find a shortest movement plan to transit from the beginning state to the end state. Since coding is not within your skill set, your approach relies on logical reasoning of the map.

#### ## Game Setup

- The stacks of blocks are presented in images. You must view and interpret the image in order to determine which blocks are in which stack and determine how to move them.
- Each block has a unique color (blue, yellow, purple, orange, red, green).
- Blocks are stacked vertically in a stack, forming multiple stacks. All stacks are on the table.
- In a single move, you can only move the top block of any pile. Attempting to move lower blocks is considered an invalid move.
- You can either (a) move the top block to the top of another stack, or (b) place the top block on the table, creating a new stack with just one block.

We provide an example to further illustrate the rules:

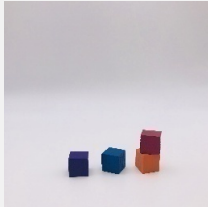

This example features four blocks arranged in three stacks:

- Stack 1: Purple block (alone)
- Stack 2: Blue block (alone)
- Stack 3: From bottom to top: Orange block, Red block

You can only move the top block of each stack: the purple block, the blue block, and the red block. The orange block is stuck underneath the red block and cannot be moved directly.

Each move can place the block on another stack or on the table (creating a new stack of one). For instance, you could move the red block to either the blue stack or the table.

**\*\*Important Note\*\***: The order of the stacks doesn't matter in this game. Two images are considered equivalent as long as the stacks contain the same blocks, regardless of the order in which the stacks appear. For example, an image with stack A on the left and stack B on the right is equivalent to an image with stack B on the left and stack A on the right.

#### ## Procedure and Output

Your output should follow this format:

1. First, analyze the starting and ending configurations, including the number of stacks and the blocks in each stack (similar to the example above).
2. Then, list the moves in a step-by-step manner using the format `move(SOURCE, TARGET)`. Remember, "SOURCE" refers to the block being moved (always the top block of a stack), and "TARGET" refers to the destination (another stack or the table).

#### ## Example Output

<Analysis>

Starting state: there are three stacks:

- Stack 1: Purple block (alone)
- Stack 2: Blue block (alone)
- Stack 3: From bottom to top: Orange block, Red block

Ending state: there are three stacks:

- Stack 1: Purple block (alone)
- Stack 2: From bottom to top: Orange block, Blue block
- Stack 3: Red block (alone)

<Output>

1. `move(red,table)`
2. `move(blue,orange)`

*(continue in next page)*



1242  
1243  
1244  
1245  
1246  
1247  
1248  
1249  
1250  
1251  
1252  
1253  
1254  
1255  
1256  
1257  
1258  
1259  
1260  
1261  
1262  
1263  
1264  
1265  
1266  
1267  
1268  
1269  
1270  
1271  
1272  
1273  
1274  
1275  
1276  
1277  
1278  
1279  
1280  
1281  
1282  
1283  
1284  
1285  
1286  
1287  
1288  
1289  
1290  
1291  
1292  
1293  
1294  
1295

(Continue)

Now please generate moving plan. The beginning state is:

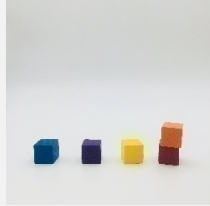

The end state is:

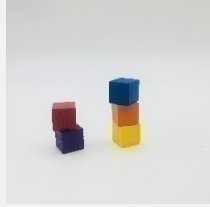

**Prompt for Block World scenario, Task 1 (Single Object Perception):**

In this task, you will see a photo of blocks. You will analyze the block configuration and then answer a question regarding the color of blocks in a specific place.

**## Game Setup**

- Each block has a unique color (blue, yellow, purple, orange, red, green).
- Blocks are stacked vertically in a stack, forming multiple stacks.
- In the questions, the position of the blocks is represented as "Stack s, Level l". The stack number is counted from left to right, and the level number is counted from bottom to top.

We provide an example to further illustrate the setting:

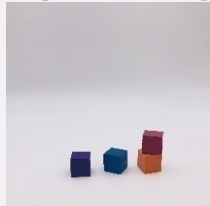

In this example, there are four blocks in three stacks. From left to right:

- Stack 1 has one level. Level 1 contains a purple block.
- Stack 2 has one level. Level 1 contains a blue block.
- Stack 3 has one level. From bottom to top: level 1 has an orange block, and level 2 has a red block.

As such, for the question "What is the color of the block at stack 3, level 1?", the correct answer is "<Output> orange".

**## Procedure and Output**

Your output should follow this format:

1. First, analyze the block configuration;
2. Then, answer the question with the format <Output> <Color>, where <Color> is one of (blue, yellow, purple, orange, red, green). For example, "<Output> red".

Now please answer the following question based on the given image below:

What is the color of the block at stack 1, level 2?

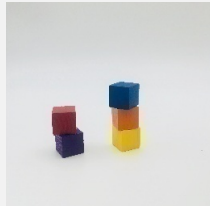

1296  
1297  
1298  
1299  
1300  
1301  
1302  
1303  
1304  
1305  
1306  
1307  
1308  
1309  
1310  
1311  
1312  
1313  
1314  
1315  
1316  
1317  
1318  
1319  
1320  
1321  
1322  
1323  
1324  
1325  
1326  
1327  
1328  
1329  
1330  
1331  
1332  
1333  
1334  
1335  
1336  
1337  
1338  
1339  
1340  
1341  
1342  
1343  
1344  
1345  
1346  
1347  
1348  
1349

**Prompt for Block World scenario, Task 2 (Spatial Relation Perception):**

In this task, you will see a photo of blocks. You will analyze the block configuration and then answer a question regarding the spatial relation of two specified blocks.

**## Game Setup**

- Each block has a unique color (blue, yellow, purple, orange, red, green).
- Blocks are stacked vertically in a stack, forming multiple stacks.
- The possible relations of two blocks include: (A) One block is directly above another block, and they are at the same stack; (B) One block is directly below another block, and they are at the same stack; (C) Two blocks are at different blocks; (D) At least one of the asked blocks does not exist in the image.

We provide an example to further illustrate the rules:

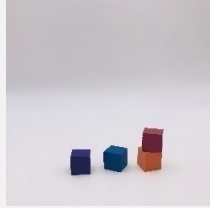

In this example, there are four blocks in three stacks. From left to right:

- Stack 1: Purple block (alone)
- Stack 2: Blue block (alone)
- Stack 3: From bottom to top: Orange block, Red block

We can answer the question regarding the spatial relations accordingly. For example, for the question “What is the spatial relation between the purple block and blue block?”, since the purple block and the blue block are at different stacks, we should choose the choice indicating they are at different stacks.

**## Procedure and Output**

Your output should follow this format:

1. First, analyze the block configuration;
2. Then, answer the question with the format <Output> <Choice>, where <Choice> is one of A,B,C,D. For example, “<Output> A”.

Now please answer the following question based on the given image below:

What is the spatial relation between the red block and the yellow block?

- (A) The red block is directly above the yellow block, and they are in the same stack.
- (B) The red block is directly below the yellow block, and they are in the same stack.
- (C) The red block and the yellow block are at different stacks.
- (D) At least one of the red block and the yellow block does not exist in the presented configurations.

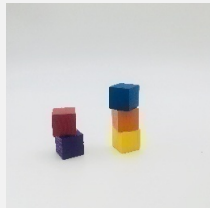

1350  
1351  
1352  
1353  
1354  
1355  
1356  
1357  
1358  
1359  
1360  
1361  
1362  
1363  
1364  
1365  
1366  
1367  
1368  
1369  
1370  
1371  
1372  
1373  
1374  
1375  
1376  
1377  
1378  
1379  
1380  
1381  
1382  
1383  
1384  
1385  
1386  
1387  
1388  
1389  
1390  
1391  
1392  
1393  
1394  
1395  
1396  
1397  
1398  
1399  
1400  
1401  
1402  
1403

**Prompt for Block World scenario, Task 3 (Environment Perception):**

In this task, you will analyze an image containing several stacks of blocks. Later, you will be presented with four choices, each offering a textual representation of a block configuration. You will need to choose the configuration that exactly reflects the contents of the given image.

**## Game Setup**

- Each block has a unique color (blue, yellow, purple, orange, red, green).
- Blocks are stacked vertically in a stack, forming multiple stacks.

This is an image input example:



This example features four blocks arranged in three stacks:

- Stack 1: Purple block (alone)
- Stack 2: Blue block (alone)
- Stack 3: From bottom to top: Orange block, Red block

Here are examples of textual representations:

(A)

- Stack with red block, yellow block, from bottom to top
- Stack with orange block, purple block, green block, from bottom to top

(B)

- Stack with purple block
- Stack with blue block
- Stack with orange block, red block, from bottom to top

(C)

- Stack with orange block
- Stack with purple block
- Stack with blue block
- Stack with green block, yellow block, from bottom to top

(D)

- Stack with green block
- Stack with yellow block, blue block, from bottom to top
- Stack with red block, orange block, from bottom to top

We can analyze which text representation exactly reflects the configurations in the image accordingly. In this example:

- The input image has 3 stacks, while Candidate A only has 2 stacks. Therefore, Candidate A is not the correct answer.
- Similarly, Candidate C has 4 stacks, which also cannot be correct.
- For Candidate B, the blocks in each stack match what's shown in the image. This is the correct answer.
- For Candidate D, the blocks in each stack do not match the image. For example, stack 1 in the image has a purple block, and there is no any purple block in Candidate D. So this is incorrect.
- Therefore, the final answer is B.

**## Procedure and Output**

Your output should follow this format:

1. First, analyze the block configuration in the image and candidates as shown above;
2. Then, answer the question with the format <Output> <Choice>, where <Choice> is one of A,B,C,D. For example, "<Output> A".

Now please choose the correct textual representation based on the given image below:

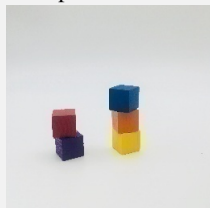

Here are the textual candidates:

<CANDIDATES>

1404  
1405  
1406  
1407  
1408  
1409  
1410  
1411  
1412  
1413  
1414  
1415  
1416  
1417  
1418  
1419  
1420  
1421  
1422  
1423  
1424  
1425  
1426  
1427  
1428  
1429  
1430  
1431  
1432  
1433  
1434  
1435  
1436  
1437  
1438  
1439  
1440  
1441  
1442  
1443  
1444  
1445  
1446  
1447  
1448  
1449  
1450  
1451  
1452  
1453  
1454  
1455  
1456  
1457

**Prompt for Maze Navigation scenario, Task 4 (Spatial Reasoning):**

You are a robot that sorts and organizes colored blocks by adding and removing them to stacks. You can move them between stacks to produce a desired end state.

In this task, you will see a photo of blocks. This photo shows the beginning state of the blocks. You will see a photo of blocks. This photo shows the beginning state of the blocks. Meanwhile, you will be provided an action sequence about moving blocks. Your task is to determine if the provided action plan can be successfully executed.

**## Game Setup**

- The block configuration is presented in the image. You must view and interpret the image in order to determine which blocks are in which stack and determine the consequence of moving.

- Each block has a unique color (blue, yellow, purple, orange, red, green).

- Blocks are stacked vertically in a stack, forming multiple stacks.

- A valid action can only move the top block of any stacks. Attempting to move lower blocks is considered an invalid move.

- For the destination, a valid move can either (a) move the top block to the top of another stack, or (b) place the top block on the table, creating a new stack with just one block.

We provide an example to further illustrate the rules:

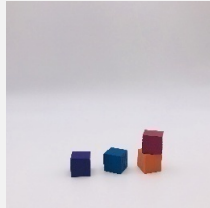

The sequence of actions provided is: 1. move(red,table) 2. move(green,table)

In this example, there are four blocks in three stacks. The stacks are:

- Stack 1: Purple block (alone)

- Stack 2: Blue block (alone)

- Stack 3: From bottom to top: Orange block, Red block

It is valid to move the purple block, the blue block, and the red block, since they are at the top of a stack. It is invalid to move the orange block since it is not at the top of a stack (because it is covered by the red block).

Each move can place the block on top of another stack or on the table (creating a new stack of one). For instance, you could move the red block to either the blue stack or the table.

**## Procedure and Output**

Your output should follow this format:

1. First, briefly analyze the block configuration, and check each action step by step to see if the provided step is valid as shown above.

2. Then, answer the question with the format "<Output> Yes" or "<Output> No" to indicate if the action sequence is valid.

Here is an example for the output:

<Analysis> In the image, there are three stacks:

- Stack 1: Purple block (alone)

- Stack 2: Blue block (alone)

- Stack 3: From bottom to top: Orange block, Red block

The first action "move(red,table)" is valid, because the red block is on top of a stack (stack 3 in this case), and the target is "table". After the first action, the state will become:

- Stack 1: Purple block (alone)

- Stack 2: Blue block (alone)

- Stack 3: Orange block (alone)

- Stack 4: Red block (alone)

The second action "move(green,table)" is invalid, because there is no green block.

Therefore, the provided action sequence is invalid.

<Output> No

Now please determine if the provided action sequence is valid given the following input state:

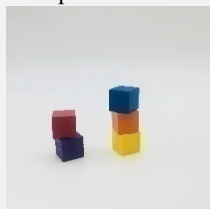

The action sequence is: 1. move(red,table) 2. move(yellow,red) 3. move(purple,table)

1458  
1459  
1460  
1461  
1462  
1463  
1464  
1465  
1466  
1467  
1468  
1469  
1470  
1471  
1472  
1473  
1474  
1475  
1476  
1477  
1478  
1479  
1480  
1481  
1482  
1483  
1484  
1485  
1486  
1487  
1488  
1489  
1490  
1491  
1492  
1493  
1494  
1495  
1496  
1497  
1498  
1499  
1500  
1501  
1502  
1503  
1504  
1505  
1506  
1507  
1508  
1509  
1510  
1511

**Prompt for Google Map scenario:**

As a professional pathfinder, your task is to analyze a map and find a route from the starting location to the goal.

**## Game Setup**

- The game presents a fully observable map.
- The starting location is marked with blue “S”, and the goal is marked with red “G”.
- Your goal is to find a path from the starting location to the goal.

**## Moving Rules**

- The action plan involves moves in four directions: ‘W’ (West), ‘E’ (East), ‘N’ (North), or ‘S’ (South).
  - Each move is along with distances. Distances are measured by how many crossroads passed.
- We provide an example to further illustrate the rules.

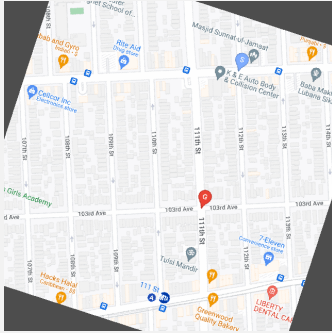

In this provided example:

- You are now at the southwest of the goal.
- If you move north by 1 crossroad, you will be at the west of the goal.
- If you move east by 4 crossroads, you will be at the goal.
- IMPORTANT: Please ignore the name of the street and avenue. The numbers in the name cannot be used to compute how many crossroads need to be passed.

**## Procedure and Output**

Now you will solve the given maze. To solve it, please first analyze the relative spatial relation between the starting point and the goal (for example, southwest). Then, output a path using the format <Direction>:<Number of crossroads passed>.

For example:

<Output>

1. North: 1
2. East: 4

means move north by 1 crossroad, and move east by 4 crossroads.

<Output>

1. South: 1

means move south by 1 crossroad.

Do not output any extra content after the above aggregated output.

Please output path for the following map:

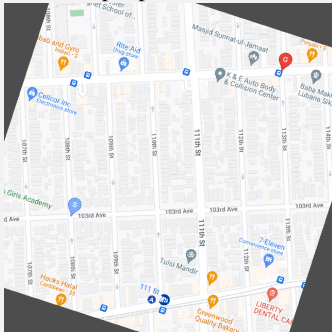

1512  
1513  
1514  
1515  
1516  
1517  
1518  
1519  
1520  
1521  
1522  
1523  
1524  
1525  
1526  
1527  
1528  
1529  
1530  
1531  
1532  
1533  
1534  
1535  
1536  
1537  
1538  
1539  
1540  
1541  
1542  
1543  
1544  
1545  
1546  
1547  
1548  
1549  
1550  
1551  
1552  
1553  
1554  
1555  
1556  
1557  
1558  
1559  
1560  
1561  
1562  
1563  
1564  
1565

### Prompt for Collision scenario:

As a professional navigation agent, your task is to analyze a map and determine the time needed for the car and the person passing the goal. Then, determine if there is a danger of collision.

#### ## Game Setup

- The game presents a fully observable map. There is a person, a car, and a goal on the map.
  - The game further specifies the moving direction of the person and car ("up", "down", "left", "right").
  - Your will need to determine the time needed for the car and the person passing the goal through calculation.
  - If the car and the person reaches the goal within 0.5 second, then there is a danger of collision.
- The following figure shows how the person, the car, and the goals look like.

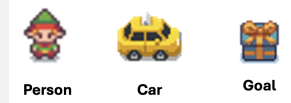

We provide an example to further illustrate the rules.

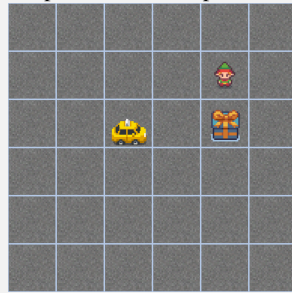

The car is moving right with speed 1.0 grid per second, and the person is moving down with speed 0.5 grid per second.

In this provided example:

- The car is 2 grid away from the goal. Given it's time as 1.0 grid per second, the time needed is  $2 / 1.0 = 2$  seconds.
- The person is 1 grid away from the goal. Given it's time as 0.5 grid per second, the time needed is  $1 / 0.5 = 2$  seconds.
- Since they both reach the goal in 2 seconds, there is a danger of collision.

#### ## Procedure and Output

Now you will answer for the following given map. To solve it, analyze the car and the person separately. Then, answer for them separately. For example:

Car: 2.0

Person: 2.0

Yes

means car and the person will need 2.0 seconds to pass the goal respectively, and there is a danger of collision. Do not output any extra content after the above aggregated output.

Now please analyze and determine the time needed for the car and the person passing the goal:

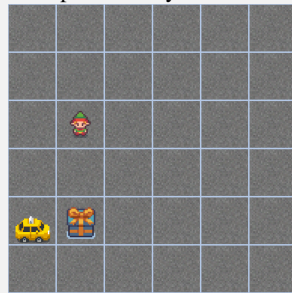

The car is moving right with speed 2.0 grid per second, and the person is moving down with speed 1.0 grid per second.

## B PROMPT FOR TEXTUAL INPUT

In Section 4.4, we described the procedure of using textual representation instead of visual input. Below, we use the main task in the maze navigation scenario as an example to show the complete prompt after making the replacement.

### **Prompt for Maze Navigation scenario, Main task (Spatial Planning, Textual Input):**

As a professional maze solver, your task is to analyze a grid-based map and devise an action plan that enables a player to reach the goal from the starting point without falling into any holes, using the fewest possible moves. Since coding is not within your skill set, your approach relies on logical reasoning of the map.

#### ## Game Setup

- The game presents a fully observable grid-based map.
- The player starts at a specified grid square, with the goal located elsewhere on the map.
- Each grid square is either safe or contains a hole.
- Your goal is to guide the player to the goal while avoiding holes.

#### ## Moving Rules

- The action plan involves a series of moves: 'L' (left), 'R' (right), 'U' (up), or 'D' (down).
- Each move transfers the player to the adjacent square in that direction, provided it is a safe square. The player cannot move more than one square at a time.
- Moving off the edge of the map has no effect. The player will remain at the same square.
- DO NOT MOVE INTO A HOLE! Falling into a hole results in defeat.
- Locating at the grid containing the goal results in victory.

We provide an example to further illustrate the rules.

Example Input:

This is a 4x4 map.

The player is at: row 1, column 1;

The hole(s) are at: row 1, column 2; row 4, column 1;

The goal is at: row 4, column 4.

In this provided example:

- The player is at Row 1, Column 1;
- The goal is at Row 4, Column 4;
- There are two holes: one at Row 1, Column 2, and another at Row 4, Column 1.
- The player can move DOWN. This is because moving down brings them to Row 2, Column 1, and this cell is safe (without holes).
- Moving UP has no effects. This is because the player is already in the topmost row.
- Similarly, moving LEFT has no effects because the player is already in the left-most column.
- Moving RIGHT places the player at Row 1, Column 2. Since there is a hole at this grid, this move results in a loss.

#### ## Procedure and Output

Now you will solve the given maze. To solve it, please generate text exactly follow the following steps:

1. First, interpret map. List where the player is at now, where is the goal, and where are the holes.
2. Then, generate an action plan to navigate to the goal step by step. At each step, you should check:
  - (a) Where the current move leads the player to (the row and column);
  - (b) What is in that grid. Is it a hole? Is it the goal? Is it an empty space?
  - (c) Determine if that is a safe action. If not, correct it and re-generate the action plan.
3. Next, verify if the steps successfully navigate the player to the goal without falling into the hole. If not, restart from step 2 and re-generate this step.
4. If succeed, output an aggregated plan using "Action plan: <PLAN>", where <PLAN> is a string concatenated action in each step. For example, "Action plan: L,L,R,U,D" meaning an action plan of left, left, right, up, and down. Double check the final action plan is consistent with the previous analysis. Do not output any extra content after the above aggregated output.

Please generate the action plan for the following maze:

This is a 3x3 map.

The player is at: row 3, column 2;

There is no holes in this map;

The goal is at: Row 1, Column 2.



## C PROMPT WITH IN-CONTEXT EXAMPLES

In Section 4.4, we described the procedure of including in-context example in the test. Below, we use the main task in the maze navigation scenario as an example to show the complete prompt after adding in-context examples.

### Prompt for Maze Navigation scenario, Main task (Spatial Planning, in-context examples):

As a professional maze solver, your task is to analyze a grid-based map and devise an action plan that enables a player to reach the goal from the starting point without falling into any holes, using the fewest possible moves. Since coding is not within your skill set, your approach relies on logical reasoning of the map.

#### ## Game Setup

- The game presents a fully observable grid-based map.
- The player starts at a specified grid square, with the goal located elsewhere on the map.
- Each grid square is either safe or contains a hole.
- Your goal is to guide the player to the goal while avoiding holes.

The following figure shows how the player, the holes (non-safe grid), the lands (safe grids), and the goals look like.

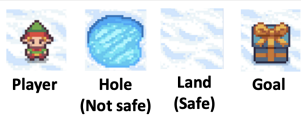

#### ## Moving Rules

- The action plan involves a series of moves: 'L' (left), 'R' (right), 'U' (up), or 'D' (down).
- Each move transfers the player to the adjacent square in that direction, provided it is a safe square. The player cannot move more than one square at a time.
- Moving off the edge of the map has no effect. The player will remain at the same square.
- DO NOT MOVE INTO A HOLE! Falling into a hole results in defeat.
- Locating at the grid containing the goal results in victory.

We provide an example to further illustrate the rules.

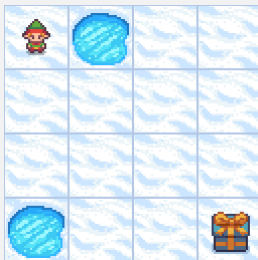

In this provided example:

- The player is at Row 1, Column 1;
- The goal is at Row 4, Column 4;
- There are two holes: one at Row 1, Column 2, and another at Row 4, Column 1.
- The player can move DOWN. This is because moving down brings them to Row 2, Column 1, and this cell is safe (without holes).
- Moving UP has no effects. This is because the player is already in the topmost row.
- Similarly, moving LEFT has no effects because the player is already in the left-most column.
- Moving RIGHT places the player at Row 1, Column 2. Since there is a hole at this grid, this move results in a loss.

*(continue in next page)*

1674  
1675  
1676  
1677  
1678  
1679  
1680  
1681  
1682  
1683  
1684  
1685  
1686  
1687  
1688  
1689  
1690  
1691  
1692  
1693  
1694  
1695  
1696  
1697  
1698  
1699  
1700  
1701  
1702  
1703  
1704  
1705  
1706  
1707  
1708  
1709  
1710  
1711  
1712  
1713  
1714  
1715  
1716  
1717  
1718  
1719  
1720  
1721  
1722  
1723  
1724  
1725  
1726  
1727

(Continue)

## Procedure and Output

Now you will solve the given maze. To solve it, please generate text exactly follow the following steps:

1. First, interpret map. List where the player is at now, where is the goal, and where are the holes.
2. Then, generate an action plan to navigate to the goal step by step. At each step, you should check:
  - (a) Where the current move leads the player to (the row and column);
  - (b) What is in that grid. Is it a hole? Is it the goal? Is it an empty space?
  - (c) Determine if that is a safe action. If not, correct it and re-generate the action plan.
3. Next, verify if the steps successfully navigate the player to the goal without falling into the hole. If not, restart from step 2 and re-generate this step.

## Example:

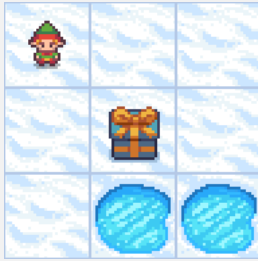

<Interpret>

The player is at row 1, column 1, and the goal is at row 2, column 2.

There are 2 holes. They are at: row 3, column 2; row 3, column 3.

<Action Plan>

- Moving Right (R). The player is now at row 1, column 2. This grid is safe.
- Moving Down (D). The player is now at row 2, column 2. This grid is the goal, so we stop here.

<Verification>

1. Right to row 1, column 2 (safe)
2. Down to row 2, column 2 (goal)

<Output>

Action plan: R,D

Please generate the action plan for the following maze:

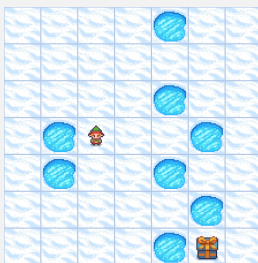

Table 6: Training details on LLaVA and InternLM-XComposer.

|                 |                       | Value                  |
|-----------------|-----------------------|------------------------|
| <b>LLaVA</b>    | Learning rate         | 2e-4                   |
|                 | Scheduler             | Cosine                 |
|                 | Epoch                 | 1                      |
|                 | Training data         | 10k                    |
|                 | Batch size            | 32                     |
|                 | Pretrained Checkpoint | llava-v1.6-vicuna-7b   |
| <b>InternLM</b> | Learning rate         | 5e-5                   |
|                 | Scheduler             | Cosine                 |
|                 | Epoch                 | 1                      |
|                 | Training data         | 10k                    |
|                 | Batch size            | 8                      |
|                 | Pretrained Checkpoint | internlm-xcomposer2-7b |

Table 7: Model performance on task 1 - 4 with different difficulties.

| Task 1                          | MAZE NAVIGATION |      |      |      |      |            | BLOCKSWORD |      |      |
|---------------------------------|-----------------|------|------|------|------|------------|------------|------|------|
|                                 | 3               | 4    | 5    | 6    | 7    | 8          | 3          | 4    | 5    |
| Gemini Team et al. (2023)       | 0.63            | 0.58 | 0.61 | 0.45 | 0.64 | 0.54       | 0.86       | 0.82 | 0.89 |
| GPT-Vision Achiam et al. (2023) | 0.60            | 0.56 | 0.56 | 0.47 | 0.62 | 0.54       | 0.77       | 0.70 | 0.72 |
| Claude-3 AI (2024a)             | 0.44            | 0.41 | 0.39 | 0.42 | 0.55 | 0.49       | 0.52       | 0.40 | 0.36 |
| GPT-4o AI                       | 0.72            | 0.65 | 0.57 | 0.44 | 0.56 | 0.53       | 0.98       | 0.94 | 0.92 |
| Task 2                          | MAZE NAVIGATION |      |      |      |      |            | BLOCKSWORD |      |      |
|                                 | 3               | 4    | 5    | 6    | 7    | 8          | 3          | 4    | 5    |
| Gemini Team et al. (2023)       | 0.69            | 0.65 | 0.53 | 0.46 | 0.54 | 0.47       | 0.63       | 0.57 | 0.32 |
| GPT-Vision Achiam et al. (2023) | 0.37            | 0.27 | 0.22 | 0.30 | 0.29 | 0.18       | 0.86       | 0.77 | 0.77 |
| Claude-3 AI (2024a)             | 0.65            | 0.65 | 0.70 | 0.65 | 0.67 | 0.70       | 0.59       | 0.57 | 0.43 |
| GPT-4o AI                       | 0.80            | 0.63 | 0.65 | 0.64 | 0.66 | 0.64       | 0.90       | 0.92 | 0.87 |
| Task 3                          | MAZE NAVIGATION |      |      |      |      |            | BLOCKSWORD |      |      |
|                                 | 3               | 4    | 5    | 6    | 7    | 8          | 3          | 4    | 5    |
| Gemini Team et al. (2023)       | 0.38            | 0.32 | 0.36 | 0.23 | 0.37 | 0.30       | 0.62       | 0.51 | 0.49 |
| GPT-Vision Achiam et al. (2023) | 0.79            | 0.41 | 0.43 | 0.37 | 0.33 | 0.40       | 0.68       | 0.76 | 0.67 |
| Claude-3 AI (2024a)             | 0.35            | 0.22 | 0.18 | 0.32 | 0.35 | 0.47       | 0.52       | 0.45 | 0.49 |
| GPT-4o AI                       | 0.89            | 0.72 | 0.49 | 0.4  | 0.39 | 0.59       | 0.85       | 0.95 | 0.90 |
| Task 4                          | MAZE NAVIGATION |      |      |      |      | BLOCKSWORD |            |      |      |
|                                 | 1               | 3    | 5    | 7    | 9    | 1          | 3          | 5    | 7    |
| Gemini Team et al. (2023)       | 0.47            | 0.47 | 0.56 | 0.49 | 0.46 | 0.64       | 0.57       | 0.50 | 0.50 |
| GPT-Vision Achiam et al. (2023) | 0.62            | 0.55 | 0.57 | 0.52 | 0.53 | 0.66       | 0.70       | 0.74 | 0.73 |
| Claude-3 AI (2024a)             | 0.57            | 0.60 | 0.60 | 0.59 | 0.67 | 0.72       | 0.65       | 0.60 | 0.68 |
| GPT-4o AI                       | 0.72            | 0.78 | 0.79 | 0.67 | 0.76 | 0.92       | 0.73       | 0.70 | 0.68 |

## D TRAINING DETAILS

In this section, we describe the training details when we fine-tune LLaVA and InternLM-XComposer for our designed tasks. We perform LoRA fine-tuning, and we stick with the default hyperparameter settings in their official repo. The detailed hyperparameter choices are shown in Table 6.

## E COMPLETE TASK PERFORMANCE RESULTS WITH DIFFERENT DIFFICULTY LEVELS

In this section, we present the experimental results of models across different difficulty levels. The results are shown in Table 7. As expected, we observe that as difficulty increases, all models perform progressively worse, with some performing close to random guessing at higher difficulty levels (e.g., Task 1 in Maze Navigation scenario). We also observe that GPT-4o, the most recently released model, performs the best across different tasks, although it still frequently makes mistakes under different difficulty levels. This suggests a current bottleneck in state-of-the-art MLLMs.
